# Supplementary material for: Late-life isoleucine restriction promotes physiological and molecular signatures of healthy aging
Source: PubMed Central journal article supplement — bioRxiv. 2024 Jan 9:2023.02.06.527311. Originally published 2023 Feb 7. Preprint. [Version 2] doi: 10.1101/2023.02.06.527311 (PMC9934591; doi:10.1101/2023.02.06.527311), 2024-01-09
Supplement: NIHPP2023.02.06.527311v1-supplement-1.pdf [file NIHPP2023.02.06.527311v1-supplement-1.pdf]

Supplemental Figure 1.

■ Aged Control 
 ■ Aged Low Ile 
 ■ Aged Low AA 
 ■ Young Control

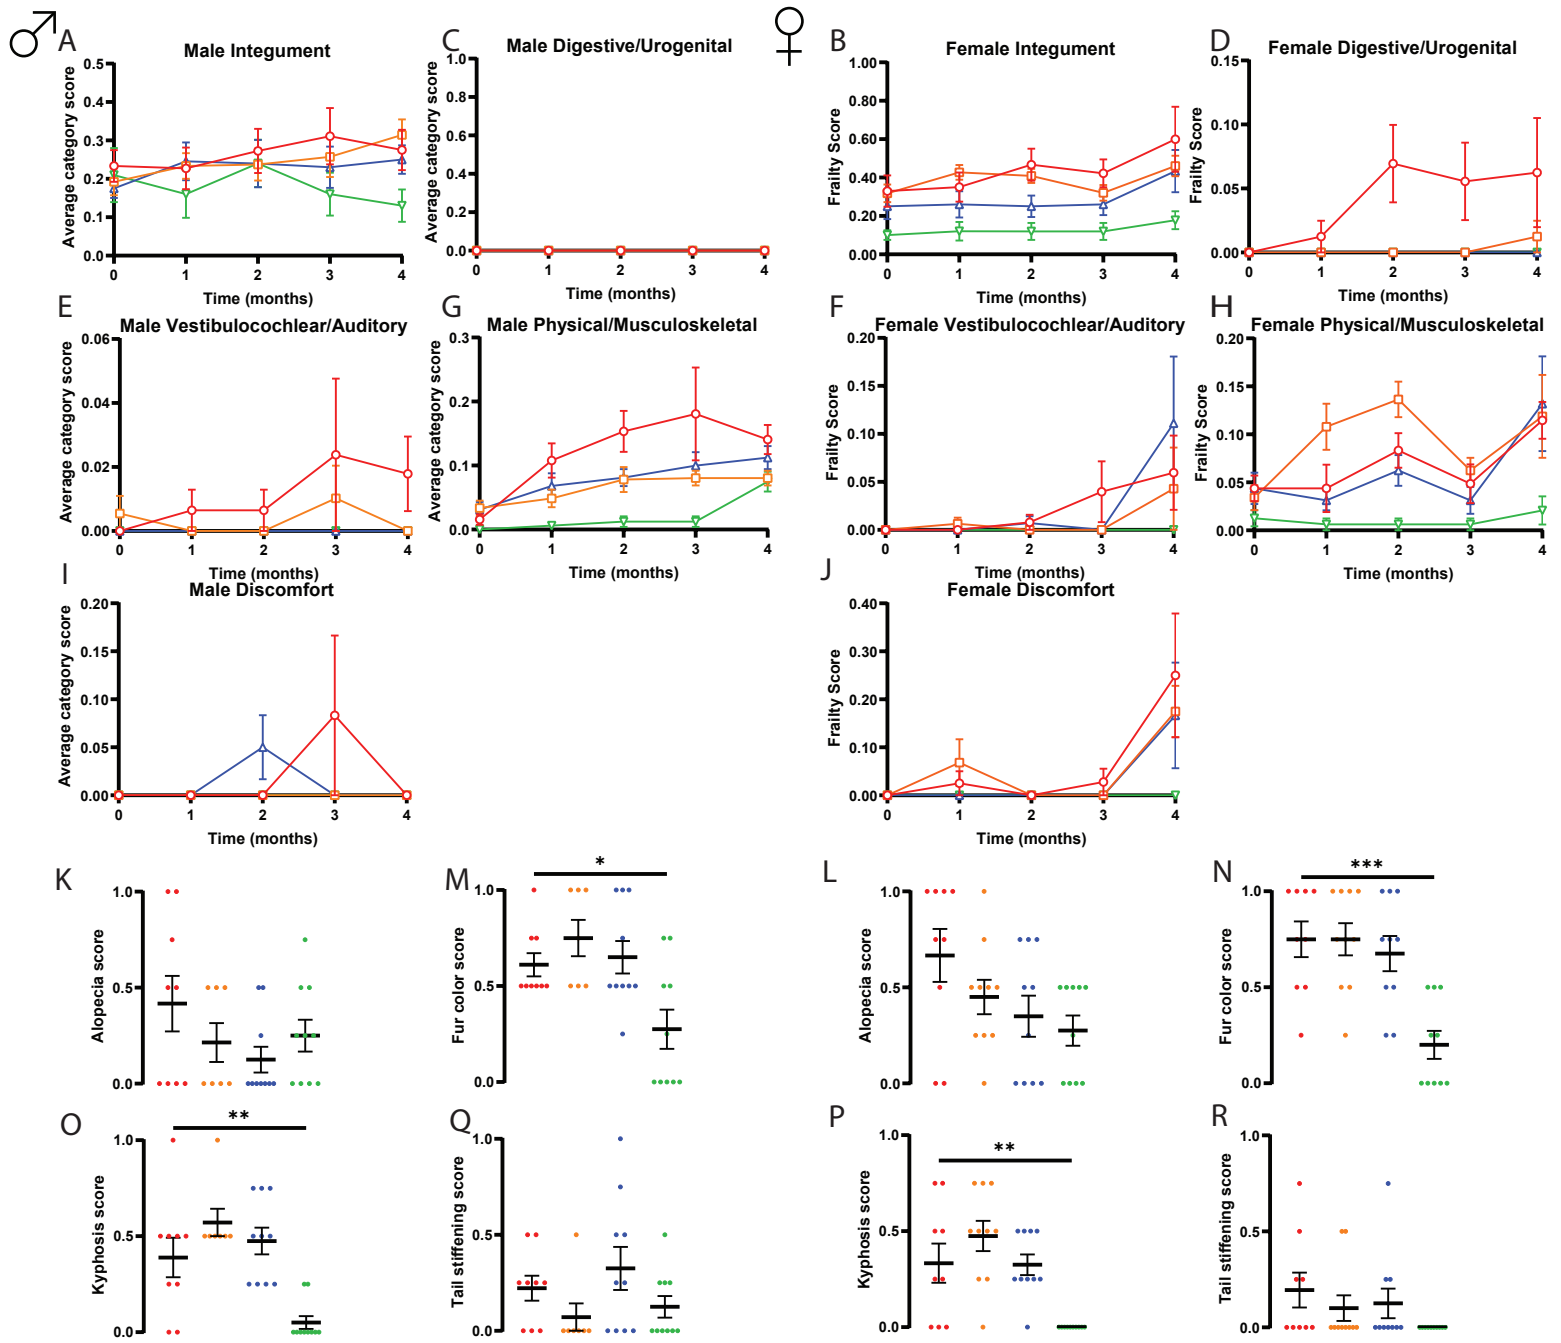

**Supplemental Figure 1. Breakdown of the frailty data into subcategories and individual measurements.**

**A-L)** Subcategories of the frailty data.

**K-R)** Selected individual frailty categories, presented as the average of 3- and 4-month scores. At the beginning of the experiments N = 10-13 each group. \*p < 0.05, one-way ANOVA with Dunnett's post-hoc test.

**■ Aged Control ■ Aged Low Ile ■ Aged Low AA ■ Young Control**

**A Aged Male ANCOVA Rotarod\*BW**

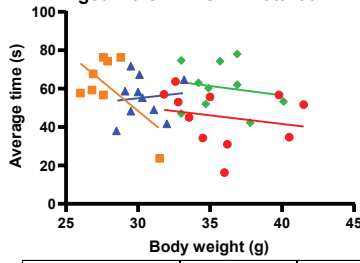

| Male group comparisons | Slope   |              | Elevation |              |
|------------------------|---------|--------------|-----------|--------------|
|                        | p-value | Significance | p-value   | Significance |
| Control vs             |         |              |           |              |
| Low Ile                | 0.17    | No           | 0.83      | No           |
| Low AA                 | 0.62    | No           | 0.47      | No           |
| Young Ctrl             | 0.97    | No           | 0.02      | Yes          |

**B Aged Male ANCOVA Cling\*BW**

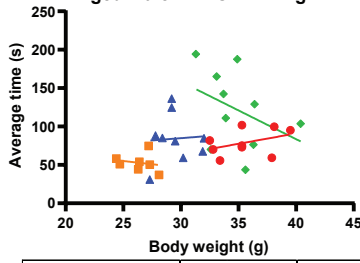

| Male group comparisons | Slope   |              | Elevation |              |
|------------------------|---------|--------------|-----------|--------------|
|                        | p-value | Significance | p-value   | Significance |
| Control vs             |         |              |           |              |
| Low Ile                | 0.40    | No           | 0.66      | No           |
| Low AA                 | 0.83    | No           | 0.41      | No           |
| Young Ctrl             | 0.19    | No           | 0.04      | Yes          |

**C Aged Female Rotarod\*BW**

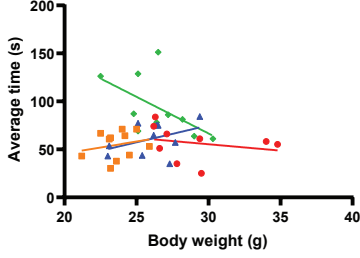

| Male group comparisons | Slope   |              | Elevation |              |
|------------------------|---------|--------------|-----------|--------------|
|                        | p-value | Significance | p-value   | Significance |
| Control vs             |         |              |           |              |
| Low Ile                | 0.41    | No           | 0.63      | No           |
| Low AA                 | 0.19    | No           | 0.64      | No           |
| Young Ctrl             | 0.17    | No           | 0.04      | Yes          |

**D Aged Female Cling\*BW**

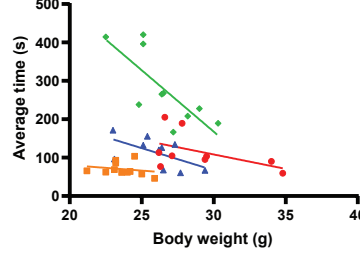

| Male group comparisons | Slope   |              | Elevation |              |
|------------------------|---------|--------------|-----------|--------------|
|                        | p-value | Significance | p-value   | Significance |
| Control vs             |         |              |           |              |
| Low Ile                | 0.61    | No           | 0.002     | Yes          |
| Low AA                 | 0.62    | No           | 0.19      | No           |
| Young Ctrl             | 0.03    | Yes          | N/A       | N/A          |

**E Young Male Inverted Cling**

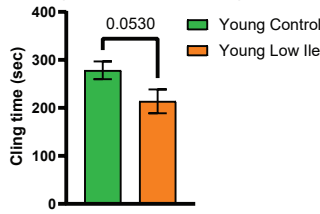

**F Young Male ANCOVA Cling\*BW**

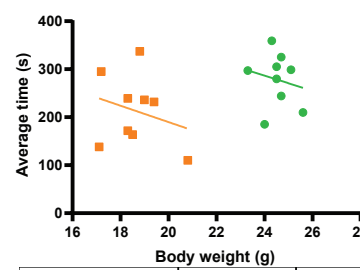

| Male group comparisons | Slope   |              | Elevation |              |
|------------------------|---------|--------------|-----------|--------------|
|                        | p-value | Significance | p-value   | Significance |
| Young Control vs       |         |              |           |              |
| Young Low Ile          | 0.98    | No           | 0.16      | No           |

**Supplemental Figure 2. ANCOVA analysis of rotarod and inverted cling assay performance with body weight as a covariable.**

**A-D)** Aged male and female mice rotarod and inverted cling ANCOVA analysis with body weight as a covariate.

**E-F)** Young 3-month old male mice were fed either Control or Low Ile diet for at least 1 month before inverted cling assay. N = 9/group, unpaired t-test.

Supplemental Figure 1

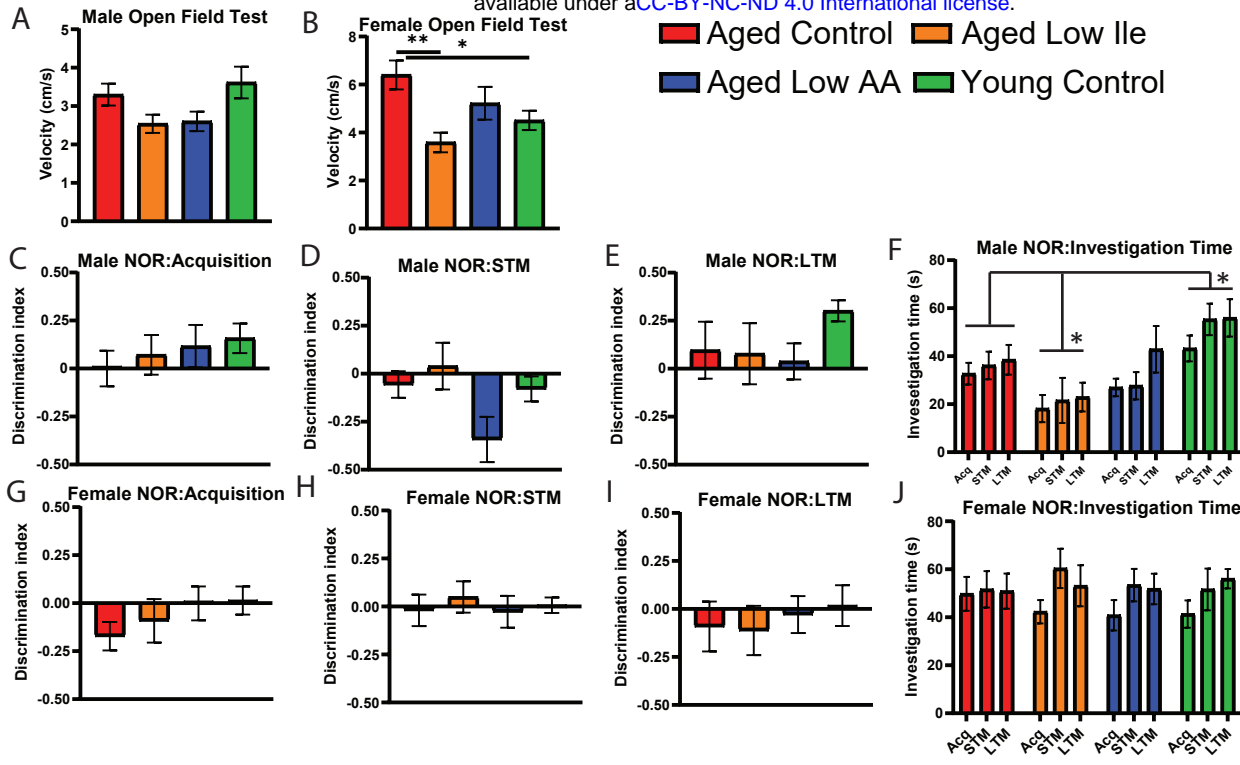

**Supplemental Figure 3. Open field and novel object recognition test.**

**A-B)** Male (A) and female (B) open field test.

**C-F)** Male mice novel object recognition test results and investigation time in each trial.

**G-J)** Female novel object recognition test results presented in the same order. A-J) N = 7-10/group. \*p < 0.05, one-way ANOVA and two-way ANOVA with Dunnett's post-hoc test.

## Supplemental Figure 4.

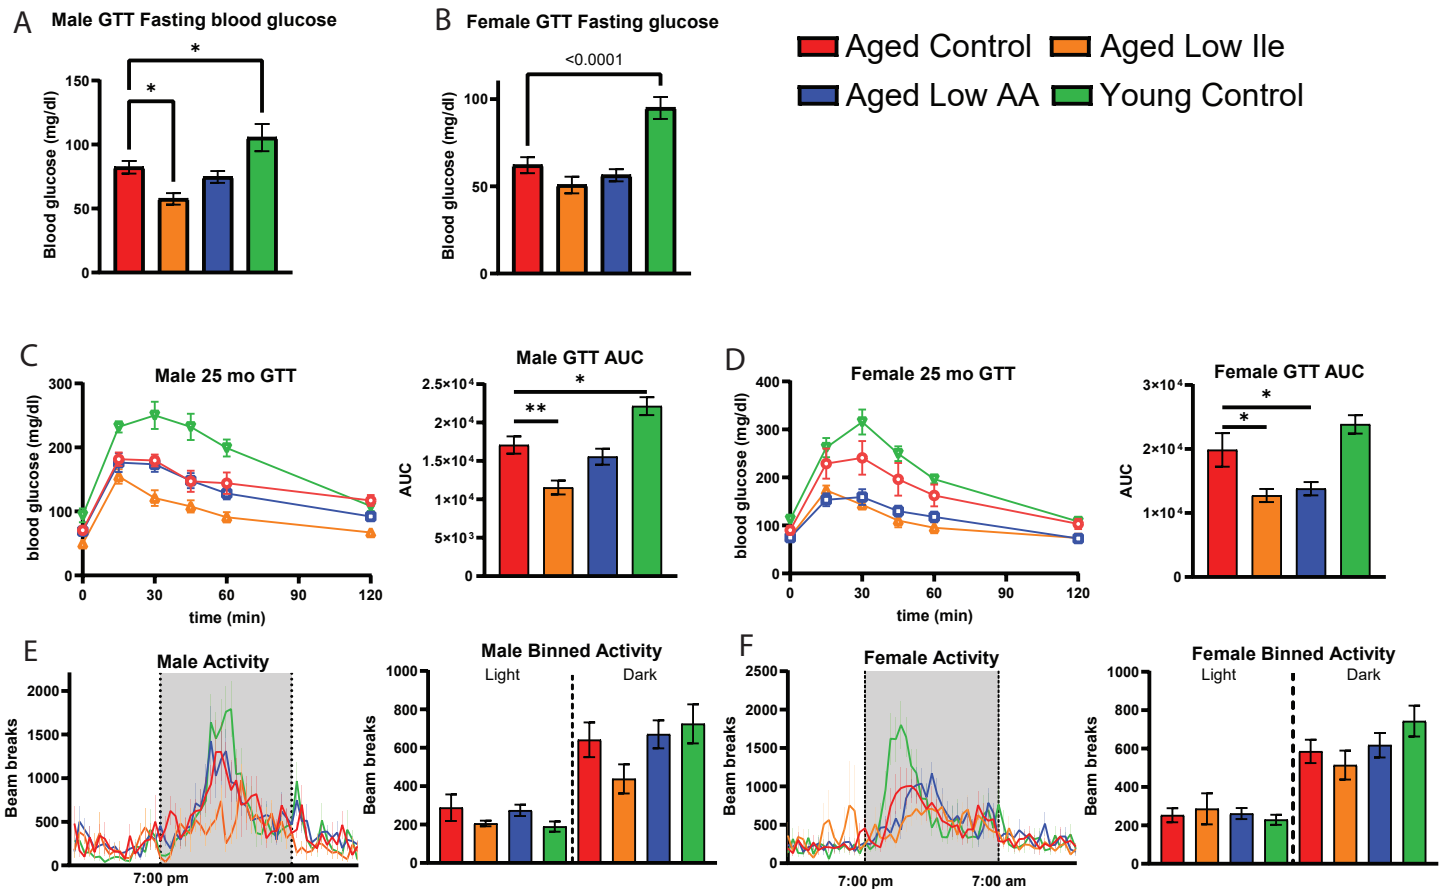

**Supplemental Figure 4. Glucose tolerance test of advanced age mice, fasting blood glucose, and activity.**

**A-B)** Male and female mice fasting blood glucose (16 hr) at 21 months of age after 3 weeks of dietary intervention. N = 10-13/group.

**C-D)** Male and female glucose tolerance test at 25 months of age after 3 weeks of dietary intervention. N = 5-10

**E-F)** Male and female activity data during metabolic chambers experiments, as in Fig. 3. N = 7-10/group. A-F)  
\* $p < 0.05$ , one-way ANOVA with Dunnett's post-hoc test.



## Liver Senescence

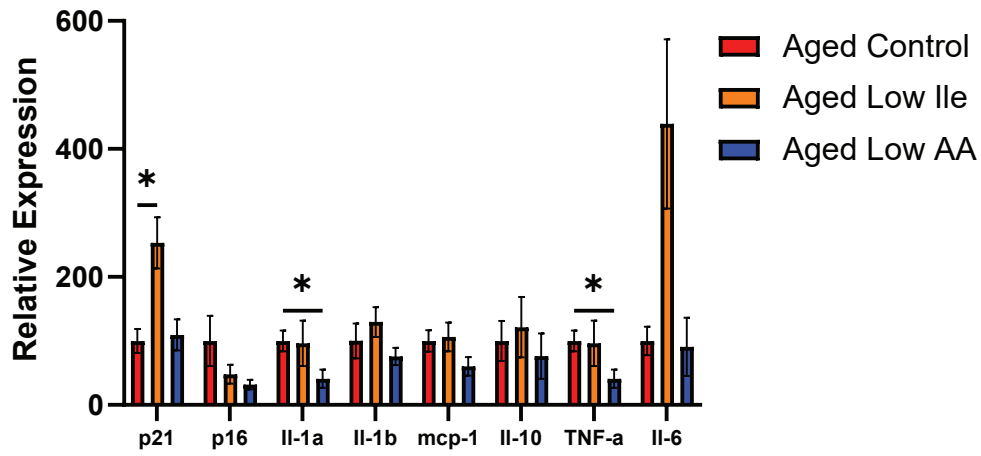

### **Supplemental Figure 5. rt-qPCR analysis of senescence markers in the male liver.**

Expression analysis of the male liver lysate after dietary intervention for the senescence-related genes IL-10. N = 5-8/group. \*p < 0.05, one-way ANOVA with Dunnett's post-hoc test.
